# Supplementary material
Source: publisher figshare collection journal article supplement (https://karger.figshare.com/ndownloader/files/24618572)
Supplement: Supplementary file 1 [file 24618572]

| **Accession number and IDs of Animal allergen proteins** | | | | |
| --- | --- | --- | --- | --- |
| pdb|4WFV | XP_012630565.1 | XP_012630564.1 | XP_008706188.1 | BAE45865.1 |
| KDR17360.1 | XP_020727845.1 | XP_019822297.1 | XP_008706187.1 | BAE45865.1 |
| NP_001035360.1 | XP_020727844.1 | OAF64053.1 | XP_008706186.1 | OXA60863.1 |
| KDR14384.1 | XP_020725501.1 | KXJ13686.1 | XP_008702524.1 | OXA62391.1 |
| KFM82824.1 | XP_020725500.1 | XP_012804513.1 | CBY93636.1 | OXA58983.1 |
| pdb|5WEE | XP_020770229.1 | XP_004653898.1 | XP_003369246.1 | OXA54094.1 |
| pdb|5WEE|C | XP_020769597.1 | XP_008706190.1 | XP_003378212.1 | OXA45999.1 |
| pdb|5WEE|D | XP_020145028.1 | XP_008706189.1 | BAD74060.2 | OXA44542.1 |
| XP_020730842.1 | XP_020730841.1 | XP_020730840.1 | XP_020724594.1 | EFV56543.1 |
| AAK12274.1 | OXA50472.1 | OXA43322.1 | OXA42154.1 | XP_020730846.1 |
| OXA64129.1 | OXA48685.1 | OXA42509.1 | OXA41534.1 | XP_020730844.1 |
| OXA63906.1 | OXA48175.1 | OXA40806.1 | OXA39940.1 | EFV51118.1 |
| OXA60315.1 | OXA43669.1 | OXA39518.1 | XP_020731239.1 |  |
| XP_020730843.1 | OXA43665.1 | OXA37363.1 | OXA36818.1 |  |

| **Accession number and IDs of plant allergen proteins** | | | | |
| --- | --- | --- | --- | --- |
| BAA06172.1 | sp|P81295.1 | AEE34450.1 | OMO72675.1 | PNY01836.1 |
| AAA32671.1 | sp|Q7Y1X1.1 | AED91856.1 | KVI11789.1 | PNY01836.1 |
| CAA55854.1 | pdb|3OB4|A | NP_196818.1 | AED92204.1 | PNX80673.1 |
| sp|P18632.3 | BAD09208.1 | NP_176774.1 | AEC06520.1 | PNX71771.1 |
| sp|E1U332.1 | BAD09204.1 | OMP03616.1 | NP_179254.2 | OTF87078.1 |
| NP_567562.2 | OMP12302.1 | OMP08613.1 | OMO92202.1 | OMO92200.1 |
| OMO92165.1 | pdb|4N42|A | AAD20920.1 | CAC05582.1 | AES74729.1 |
| ABA98863.1 | AAF25553.1 | AAO50557.1 | AAO41979.1 | CAA01911.1 |
| PWA96184.1 | PWA62909.1 | PWA62858.1 | PWA47474.1 | PON91843.1 |
| PON51874.1 | ANM64155.1 | NP_001326202.1 | JAV45574.1 | ONM56233.1 |
| AQK61269.1 | AQK57370.1 | AQK57369.1 | ONM29876.1 | AQK39769.1 |
| ONM07031.1 | EOY28217.1 | EOY17706.1 | EOY13248.1 | EOY12438.1 |
| EOY08036.1 | EOY06552.1 | EOY03811.1 | EOY03810.1 | EOY03777.1 |
| EOX99716.1 | EOX97748.1 | EOX95162.1 | EOX95161.1 | EOX95160.1 |
| EOX95158.1 | EOX95156.1 | EOX95155.1 | KVI12392.1 | JAG89064.1 |
| JAG87204.1 | JAG86409.1 | KEH42147.1 | KEH42145.1 | KEH42142.1 |
| KEH42137.1 | KEH42124.1 | KEH42122.1 | KEH42121.1 | AES67433.2 |
| AES67417.2 | KEH38354.1 | AES81924.2 | AES88673.1 | AES67432.1 |
| AES67429.1 | AES67426.1 | AES67425.1 | AES67418.1 | AES67413.1 |
| pdb|2QIM|A | pdb|1NLX|I | pdb|1NLX|H | pdb|1NLX|F | pdb|1NLX|E |
| pdb|1NLX|D | pdb|1NLX|C | pdb|1NLX|B | pdb|1NLX|A | sp|P19656.1 |
| sp|P14946.2 | sp|P10414.2 | sp|P81370.2 | PNY01836.1 |  |
